# Supplementary material
Source: PubMed Central journal article supplement (PMC3076888)
Supplement: 1102554108_pnas.1102554108_SI.pdf [file 1102554108_pnas.1102554108_SI.pdf]

# Supporting Information

Hu et al. 10.1073/pnas.1102554108

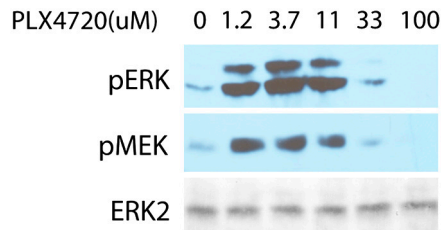

**Fig. S1.** Dose response of PLX4720 on extracellular signal regulated kinase (ERK) and mitogen activated protein kinase kinase (MEK) phosphorylation in HCT116 cells. HCT116 cells were treated for 1 h with the indicated dose of PLX4720. Cell lysates were analyzed by SDS-PAGE and after transfer to nitrocellulose membranes were immunoblotted with antibodies specific for phosphorylated ERK (pERK) or phosphorylated MEK (pMEK).

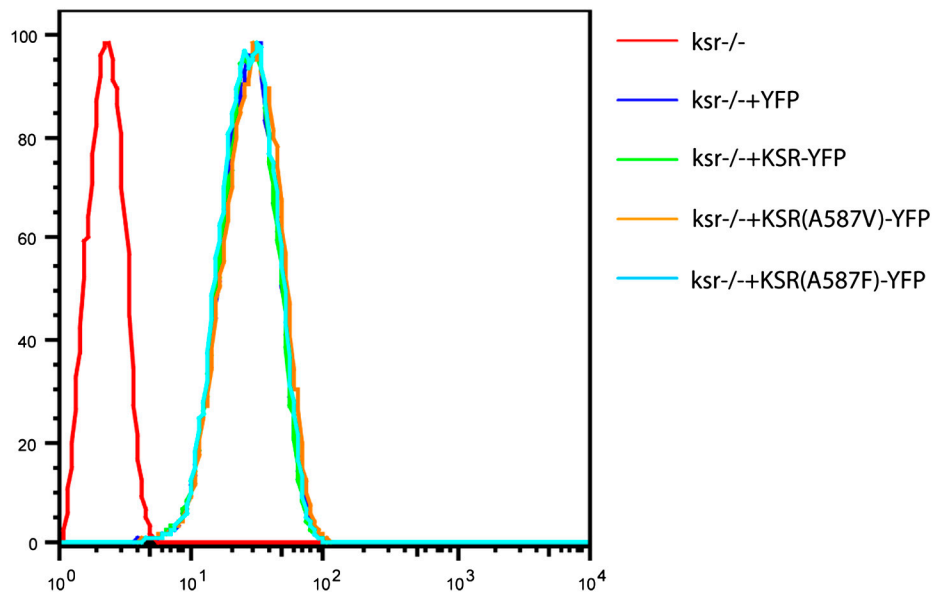

**Fig. S2.** Expression levels of transfected WT or mutant mutated kinase suppressor of Ras's (KSR)1 in *ksr*<sup>-/-</sup> mouse embryonic fibroblasts (MEFs). Wild-type or mutant KSR-GFP constructs were transfected into *KSR*<sup>-/-</sup> MEFs and selected using neomycin resistance. Neomycin resistant cells were sorted multiple times to achieve equivalent levels of GFP levels.

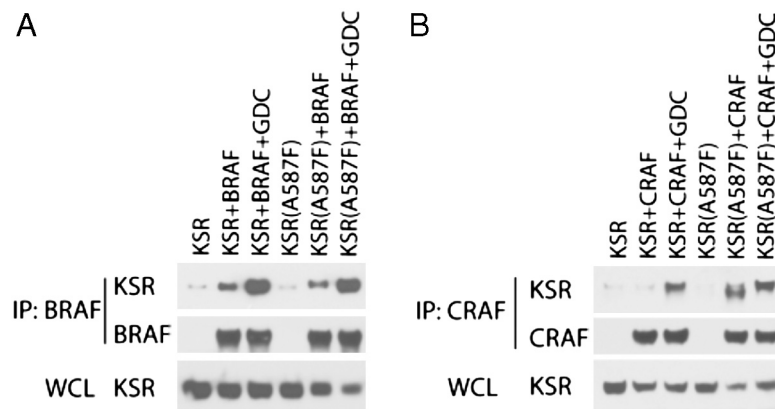

**Fig. S3.** The images in Figs. 1 B and C and 2 D and E were performed in the same experiment. So that the experiments can be comparable to each other, we include the complete blots for each experiment. Experimental details are in the figure legends for Figs. 1 and 2.

```

                                50 55          70 72          91
                                GKGXXG          AXX
PKA   40 DQFDRIKTLGTSFGGRVMLVKHKEGSGNHYAMKILDKQVVKLQIEHTLNEKRILQAVNF
BRAF  492 QGITVQQRIGSGSFGTVY--GKWHGD-VAVKMLNVTATTP--QQLQAFKNEVGLRKRTRH
CRAF  347 SEVMLSTRIGSGSFGTVY--GKWHGD-VAVKLLKVVDPDTP--EQLQAFRNEVAVLRKRTRH
KSR1  561 EQVELGEPITQGRWRGRVH--RGRWHGE-VAIKLLEMDGHNQ--DHLKLFKKEVMNRYRQTRH

PKA   PFLVKLEFSF-KDNSNLYMVEYVAGGEMFSLRRI-GRFSEPHARFYAAQIVLTFEYLH
BRAF  VNIL-LFMGY-STKPQLAIVTQWCEGSSLYHHLHIETKPFEMIKLIDIARQTAQGM DYLH
CRAF  VNIL-LFMGY-MTKDNLAIVTQWCEGSSLYKHLHVQETKQFQMPQLIDIARQTAQGM DYLH
KSR1  ENVV-LFMGACMNPPLHAIITSFCKGRTLHSFVRDPKTSLSLDINKTRQIAQEI KGMGYLH
                                165 184          208
                                HRD          DFG          APE
PKA   SLDLIYRDLKPENLLIDQQGYIQVTDPFAKRKRVK-----RTWTLCGTPEYLLAEI
BRAF  AKSIIHRDLKSNLIFLHEDLTVKIGDFGLATVKSRWSGSH----QFQLSGSILWMAPEV
CRAF  AKNIIHRDMKSNNIFLHEGLTVKIGDFGLATVKSRWSGSQ----QVEQPTGSVLWMAPEV
KSR1  ARGIVHKDLKSKNVFYD-NGKVVITDFGLFGISGVVREERREN-QLKLSHDWLCYLLAEI

                                220 225
PKA   ILS-----KGYNKAVDWALGVLIYEMAAGYPPFADQPIQIYEKIVSGKRVFP SH
BRAF  IRM-----QDKNPFYSQSDVYAFGI VLYELMTQQLPYSNINNRDQII F MVGRGYSPLD
CRAF  IRM-----QDDNPFYSQSDVYSGIVLYELMAGELPYAHINNRDQII F MVGRGYSKVR
KSR1  VREMIPGRDEDQLPFSKAADVYAFGTWVYELQARDWPPKHQPAEALIWQIGSLSPDLGEG

                                280
PKA   -----FSSDLKDLRLNLLQVLTKRFGNLKNGVNDIKNHWFATT
BRAF  -----NCPKAMKRLMAECLKKRDRPLFPQILASIELLARSLPKI
CRAF  ASPDLSRLYKNCPKAMKRLVADCVKVKVEERPLFPQILSSELQHSLPKI
KSR1  --VRRVLASVSLGKEVEILSACWAFDLQERPSFSLLMDML----ERLPKI

```

**Fig. S4.** Alignment of the “kinase” domains of protein kinase A (PKA), BRAF, CRAF, and kinase suppressor of Ras (KSR)1. The kinase core sequences are aligned and the well-known conserved motifs are in bold. V600 and S602 in the activation segment of BRAF are in red. V600 is mutated to E in many cancers and thus serves as a phosphomimetic for S602 which is a key phosphorylation site. The K to R mutation in KSR that has categorized it as a pseudokinase is shown in magenta.

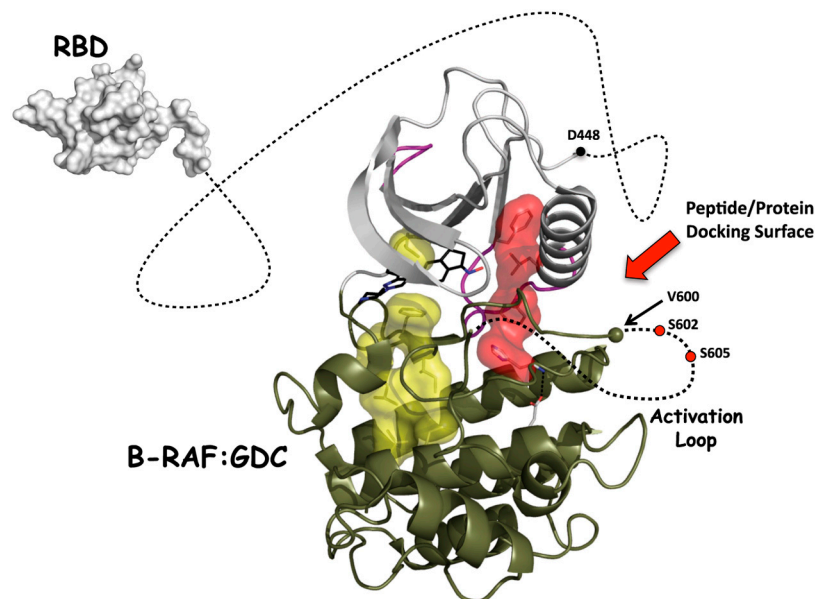

**Fig. S5.** Analysis of the hydrophobic spines in the structure of BRAF bound to GDC0879. The positions of residues making up the catalytic and regulatory hydrophobic spines were analyzed in the structure of BRAF bound to GDC0879 analogue (1). This analysis shows the assembly of both hydrophobic spines by this type I inhibitor. Catalytic spine residues are in yellow and regulatory spine residues are in red. Loops that are associated with the dimer interface are shown on the back in magenta. This image also shows the position of D448 within the SSDD sequence (446–449) of BRAF which is important in uncoupling the inhibitory amino-terminal domain from the kinase domain. It also shows the position of V600E in the activation loop close to the activation loop phosphorylation sites, S602 and S605. Replacing A481 with Phe appears to stabilize this same active conformation where the Phe replaces the adenine ring of ATP. In the GDC0879 bound structure, the drug completes the C spine. Activation of mitogen activated protein kinase kinase (MEK) and extracellular signal activated kinase (ERK) by the V600E mutation requires RAS activation. Dimer formation and inhibition by GDC0879 is also RAS dependent. Surprisingly, the A/F mutation leads to downstream activation of MEK and ERK that is independent of RAS, suggesting that in this mutant the inhibitory N-terminal segment containing the RAS binding domain (RBD) is constitutively uncoupled from the kinase domain.

1 Hansen JD, et al. (2008) Potent and selective pyrazole-based inhibitors of B-Raf kinase. *Bioorg Med Chem Lett* 18:4692–4695.

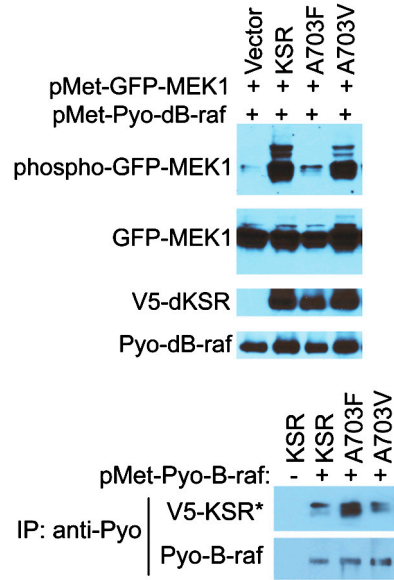

**Fig. 56.** Mutated *Drosophila* KSR (dKSR) functions similarly to mammalian KSR. A703 of dKSR is analogous to A587 of mouse KSR1, which was mutated to phenylalanine or valine using site-directed mutagenesis. Wild-type or mutated dKSR was coexpressed with dMEK in *Drosophila* S2 cells and activation of mitogen activated protein kinase kinase (MEK) was assessed using a phospho-MEK antibody. In the lower panel, the ability of wild-type and mutated dKSR to form complexes with BRAF was assessed. Wild-type and mutated dKSR was overexpressed in S2 cells with dBRAF. The dBRAF immunoprecipitates and coprecipitating dKSR were assessed by immunoblotting.
